# Supplementary material for: KAN-Enhanced Contrastive Learning Accelerating Crystal Structure Identification from XRD Patterns
Source: Research Square preprint supplement (doi:10.21203/rs.3.rs-7938426/v1), 2025-11-07
Supplement: Supplementary file 1 [file e68045120d992e2c9943de8c.docx]

**Supplementary Material for**

**KAN-Enhanced Contrastive Learning Accelerating Crystal Structure Identification from XRD Patterns**

Chenlei Xua,1, Tianhao Sua,1, Jie Xionga,d*, Yue Wua, Shuya Dong a, Tian Jianga,

Mengwei Heb, c*, Shuai Chena,d, Tong-Yi Zhanga,e*

a Materials Genome Institute, Shanghai University, Shanghai 200444 China

b Australian Centre for Microscopy and Microanalysis, School of Aerospace, Mechanical and Mechatronic Engineering, The University of Sydney, Sydney, New South Wales, Australia

c School of Computer Science, The University of Sydney, Sydney, New South Wales, Australia

d State Key Laboratory of Materials for Advanced Nuclear Energy, Shanghai University, Shanghai 20044, PR China

e Guangzhou Municipal Key Laboratory of Materials Informatics, Hong Kong University of Science and Technology (Guangzhou), Guangzhou 511400, China

1 These authors contributed equally to this work and should be considered co-first authors.

E-mail: [xiongjie@shu.edu.cn](mailto:xiongjie@shu.edu.cn) (J. Xiong), [mengwei.he@sydney.edu.au](mailto:mengwei.he@sydney.edu.au) (M. He), [zhangty@shu.edu.cn](mailto:zhangty@shu.edu.cn) (T.-Y. Zhang)

**Content**

S1. Architecture details of the XRD encoder

S2. Distribution of peak intensities in different angular range​

S3. Details of Simulated BCC MPEA

S4. Baseline architectures for space-group identification

**S1. Architecture details of the XRD encoder**

**S1.1 ResNet backbone within the DEN-KAN encoder**

The **DEN-KAN** XRD encoder employs a modified one-dimensional ResNet for hierarchical feature extraction from raw X-ray diffraction (XRD) spectra. The backbone uses depth-wise separable convolutions and residual connections to improve parameter efficiency while preserving representational capacity. In DEN-KAN, the low-angle (LA, 0 < 2θ ≤ 10) path and high-angle (HA, 10 < 2θ ≤ 80) path process different 2θ regions. XRD spectra are processed through **17 convolutional layers**, each equipped with **batch normalization** and **ReLU** activation. To accommodate dense peak spacing at higher angles, the HA path inserts a **max-pooling** layer (kernel 1 × 3, stride 2) after each residual layer to enlarge the receptive field.


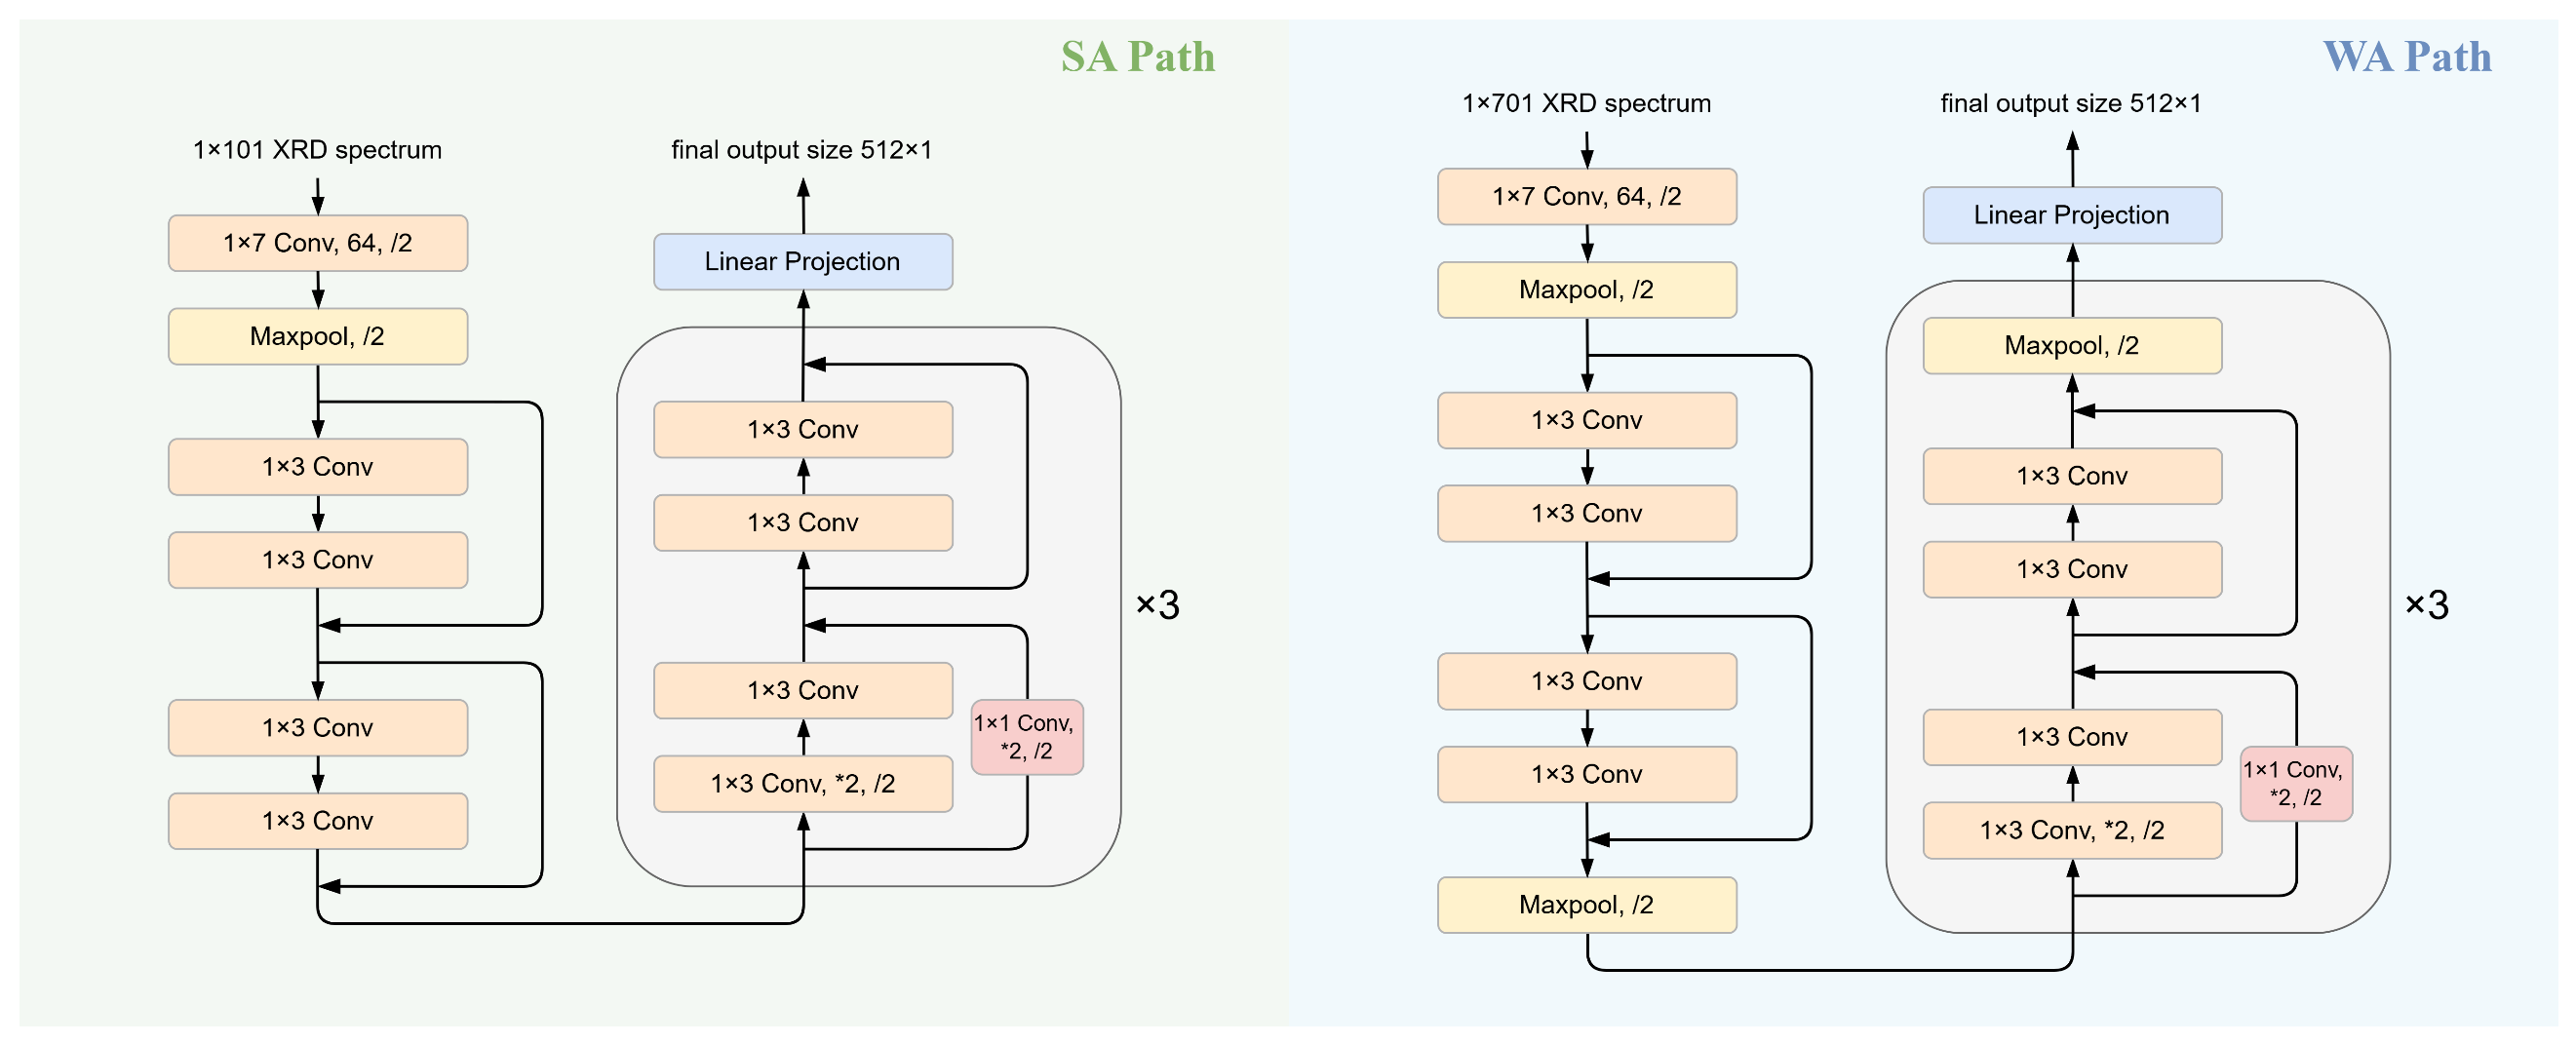


​​**Fig. S1.** Schematic of the ResNet backbone used in the (a) small-angle (SA) and (b) wide-angle (WA) path of DEN-KAN encoder.

**S1.2 WA-KAN XRD encoder**

We also consider a single-path encoder that feeds a ResNet backbone into a KAN projection head.


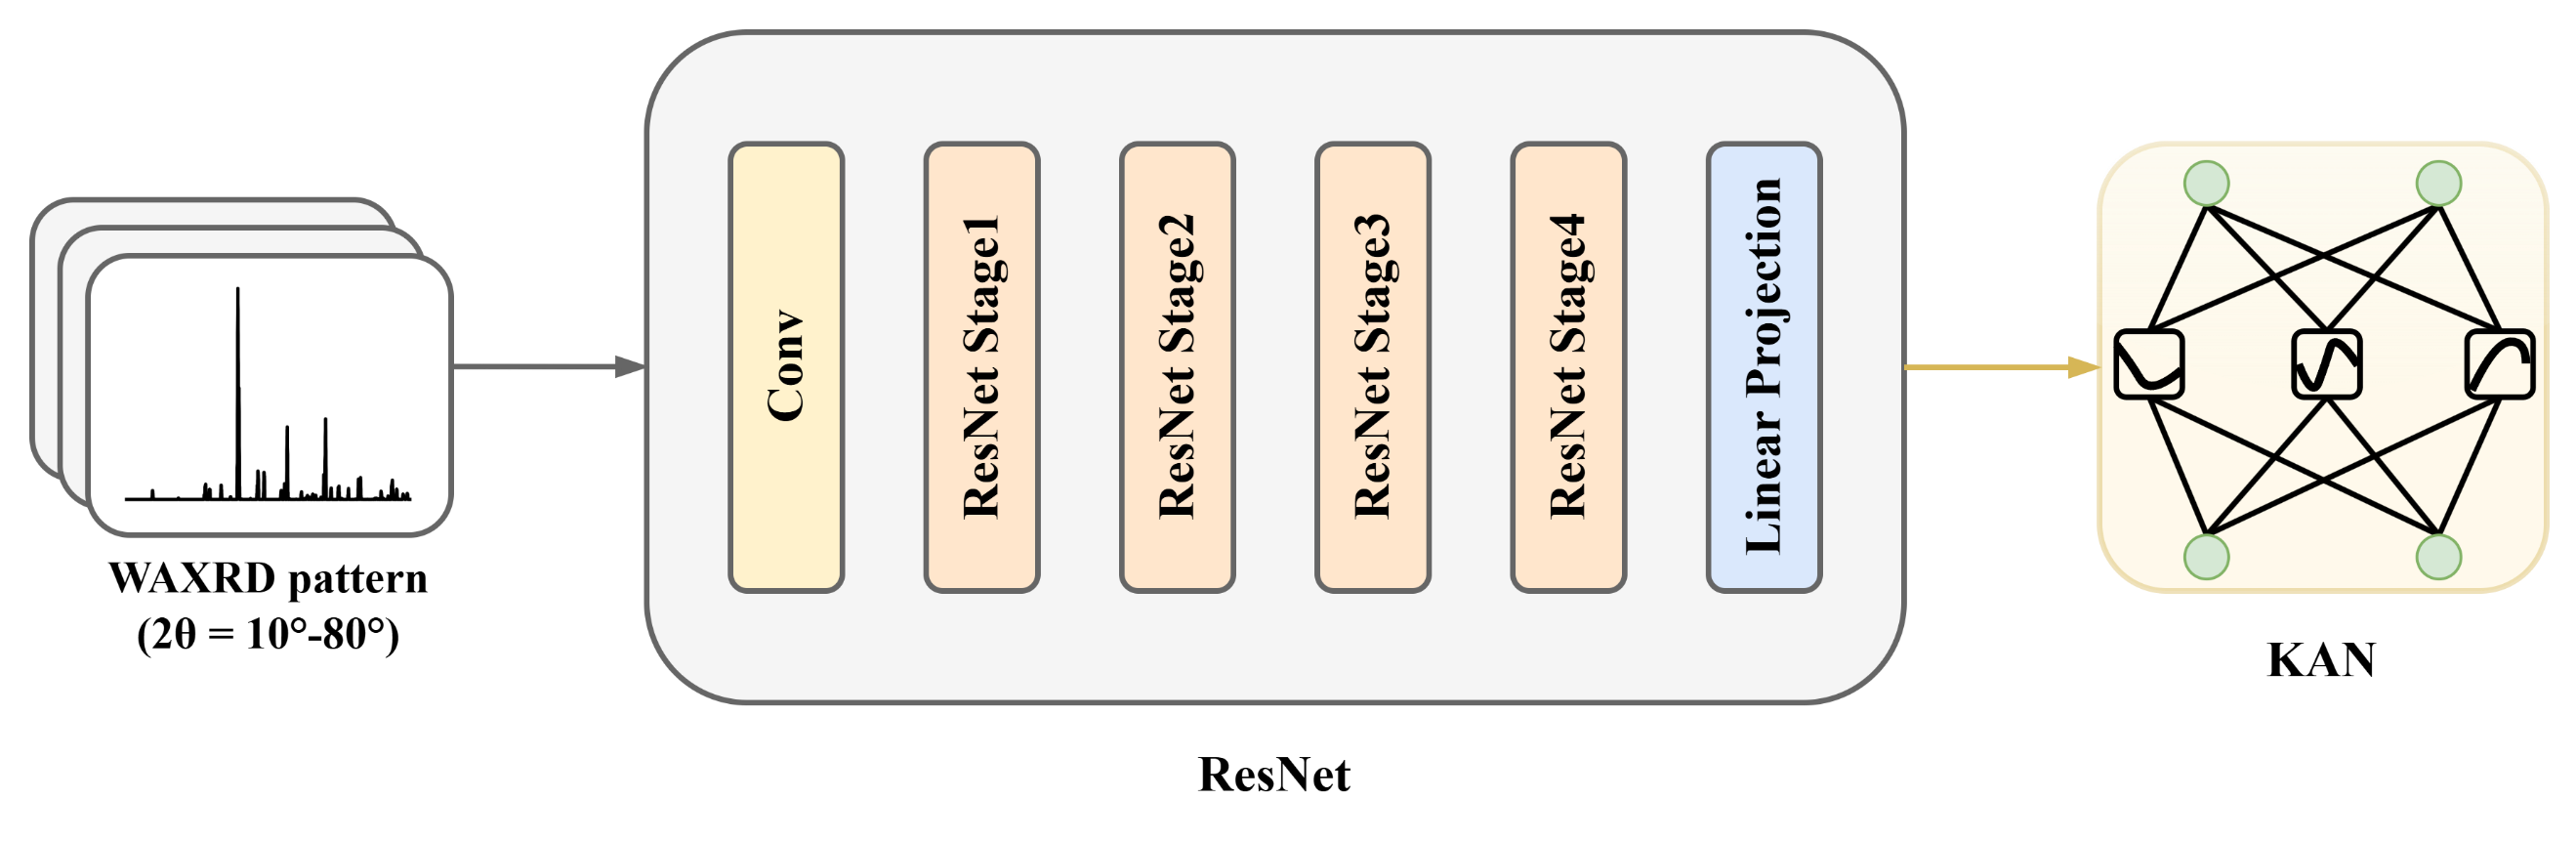


**Fig. S2**. Schematic diagram of the single-path WA-KAN encoder.

**S2. Distribution of peak intensities in different angular range**​

To quantify how diffraction intensity varies with scattering angle, we computed box-and-whisker statistics for all XRD spectra in our dataset over 0–80o 2*θ* range. The results show that, for this dataset, peak intensities within 0–10o are systematically lower than those at higher angles, reflecting weaker small-angle peaks and background characteristics common in laboratory XRD for crystalline materials.


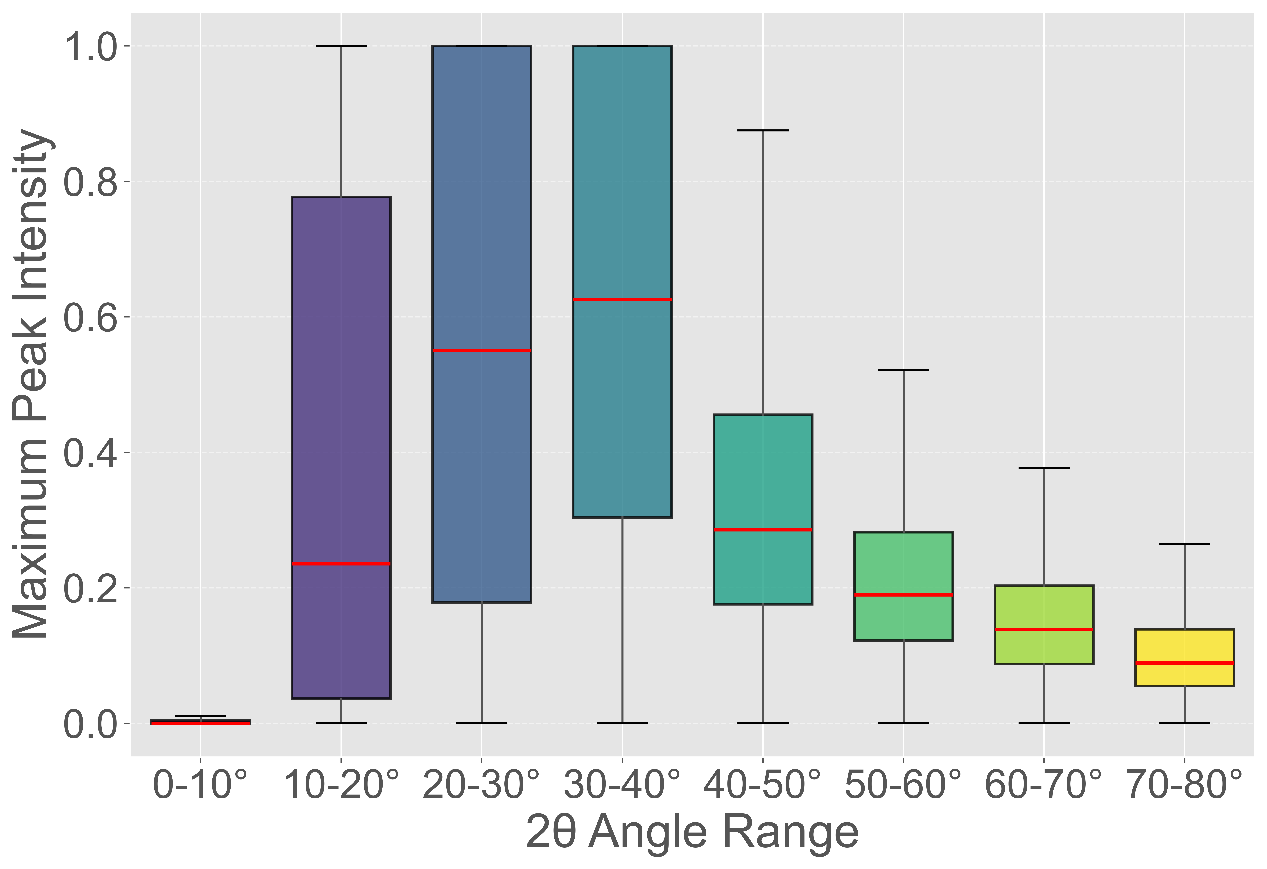


**Fig. S3**. Distribution of XRD peak intensities (a. u.) over Consecutive 10o intervals across 2θ = 0–80o

**S3. Details of Simulated BCC MPEA**

We simulated body-centered cubic (BCC) multi-principal element alloys (MPEAs) with compositions summarized in Table S1. Compositions are reported as atomic ratios (unnormalized) unless otherwise noted.

**Table S1**.​​ Compositions for the FeCrAl-based and TaNbMo-based MPEAs.

| No. | Composition |
| --- | --- |
| 1 | Fe20Cr10Al2 |
| 2 | Fe20Cr7Al1 |
| 3 | Fe20Cr8Al2 |
| 4 | Fe20Cr9Al3 |
| 5 | Fe29Cr12Al7 |
| 6 | Fe33Cr13Al8 |
| 7 | TaNbMo |
| 8 | Ta14Nb8Mo16W16 |
| 9 | Ta14Nb14Mo14Hf12 |
| 10 | Ta14Nb14Mo14V12 |
| 11 | Ta14Nb14Mo14Zr12 |
| 12 | Ta15Mo16V7W16 |
| 13 | Ta15Mo16V15W8 |
| 14 | Ta15Nb8Mo15V16 |
| 15 | Ta15Nb15Mo15Zr9 |
| 16 | Ta16Nb15Mo15V8 |
| 17 | Ta16Nb15Mo16W7 |
| 18 | TaMoVW |
| 19 | Ta18Nb18Mo18Cr18 |
| 20 | Ta18Nb18Mo18V18 |
| 21 | Ta18Nb18Mo18W18 |
| 22 | Ta19Nb19Mo19Hf15 |

​​**S4. Baseline architectures for space-group identification**

We benchmarked six baselines covering purely convolutional, transformer-based, and hybrid designs. All Conv1D layers are followed by normalization and ReLU activation unless stated.

1. **FCN:** 10 sequential Conv1D layers, no attention or transformer modules.
2. **ViT:** one Conv1D stem for initial feature extraction, tokenization into 1D patches of size 8, followed by a 6-layer, 8-head transformer encoder, a 3-layer MLP classifier.
3. **ResNet-MLP:** a 17-layer ResNet (1 conv stem and 4 stages, 2 residual blocks per stage, 2 Conv1D layers per block) with a 3-layer MLP head.
4. **ResNet-MLP:** same ResNet backbone as ResNet-MLP, the MLP head is replaced by a 3-layer KAN classifier.
5. **ResViT-MLP:** the 17-layer ResNet backbone feeds a ViT operating on 1D-patches of size 2 (6 layers, 8 heads), classification via a 4-layer MLP head.
6. **ResViT-KAN:** identical ResNet-plus-ViT configuration as ResViT-MLP, the head is replaced by 4 stacked KAN layers.

**Table S2**.​​ Baseline model configurations. *Notation*: ***Conv*** denotes a 1D convolutional layer with normalization and activation. ***Init*** is a convolutional stem. “***S*** *Stages* × ***B*** *Blocks*” indicates a hierarchical ResNet with *S* stages and *B* residual blocks per stage. ***ViT* (*P*, *L*, *H*)** is a 1D vision transformer with patch size *P*, *L* transformer layers, and *H* attention heads. ***FC*** is a multilayer perceptron head, and ***KAN*** is a Kolmogorov-Arnold Network head.

| Model | Architecture |
| --- | --- |
| **FCN** | ​10 *Conv* |
| **ViT** | 1 *Conv* (Init) + *ViT* (*P*=8, *L*=6, *H*=8) + 3 *FC* |
| **ResNet-MLP** | 17 *Conv* (Init + 4 Stages × 2 Blocks) + 3 *FC* |
| **ResNet-KAN** | 17 *Conv* (Init + 4 Stages × 2 Blocks) + 3 *KAN* |
| **ResViT-MLP** | 17 *Conv* (Init + 4 Stages×2 Blocks) + ​​*ViT* (*P*=2, *L*=6, *H*=8)​​ + 4 *FC* |
| **ResViT-KAN** | 17 *Conv* (Init + 4 Stages×2 Blocks) + ​​*ViT* (*P*=2, *L*=6, *H*=8)​​ + 4 *KAN* |
